# Supplementary material for: Trends in the Research Into Immune Checkpoint Blockade by Anti-PD1/PDL1 Antibodies in Cancer Immunotherapy: A Bibliometric Study
Source: PubMed Central journal article supplement (PMC8418110; doi:10.3389/fphar.2021.670900), 2021-08-17
Supplement: DataSheet2.pdf [file DataSheet2.pdf]

# Top References with the Strongest Citation Bursts

| References                                                         | Year | Strength | Begin | End  | 2014 - 2020 |
|--------------------------------------------------------------------|------|----------|-------|------|-------------|
| Wolchok JD, 2013, NEW ENGL J MED, V369, P122, <a href="#">DOI</a>  | 2013 | 2.27     | 2015  | 2016 |             |
| Eisenhauer EA, 2009, EUR J CANCER, V45, P228, <a href="#">DOI</a>  | 2009 | 6.2734   | 2015  | 2017 |             |
| Wolchok JD, 2009, CLIN CANCER RES, V15, P7412, <a href="#">DOI</a> | 2009 | 2.4889   | 2015  | 2017 |             |
| Robert C, 2015, NEW ENGL J MED, V372, P320, <a href="#">DOI</a>    | 2015 | 2.1852   | 2015  | 2017 |             |
| Ribas A, 2015, LANCET ONCOL, V16, P908, <a href="#">DOI</a>        | 2015 | 2.2006   | 2016  | 2017 |             |
| Postow MA, 2015, NEW ENGL J MED, V372, P2006, <a href="#">DOI</a>  | 2015 | 2.2006   | 2016  | 2017 |             |
