# Supplementary material for: Trends in the Research Into Immune Checkpoint Blockade by Anti-PD1/PDL1 Antibodies in Cancer Immunotherapy: A Bibliometric Study
Source: PubMed Central journal article supplement (PMC8418110; doi:10.3389/fphar.2021.670900), 2021-08-17
Supplement: DataSheet3.pdf [file DataSheet3.pdf]

# Top References with the Strongest Citation Bursts

| References                                                          | Year | Strength | Begin | End  | 2014 - 2020 |
|---------------------------------------------------------------------|------|----------|-------|------|-------------|
| Hamid O, 2013, NEW ENGL J MED, V369, P134, <a href="#">DOI</a>      | 2013 | 2.7402   | 2014  | 2015 |             |
| Wolchok JD, 2009, CLIN CANCER RES, V15, P7412, <a href="#">DOI</a>  | 2009 | 3.1967   | 2014  | 2017 |             |
| Hodi FS, 2010, NEW ENGL J MED, V363, P711, <a href="#">DOI</a>      | 2010 | 2.7016   | 2014  | 2017 |             |
| Topalian SL, 2014, J CLIN ONCOL, V32, P1020, <a href="#">DOI</a>    | 2014 | 2.1893   | 2014  | 2015 |             |
| Topalian SL, 2012, NEW ENGL J MED, V366, P2443, <a href="#">DOI</a> | 2012 | 4.0866   | 2014  | 2015 |             |
| Chapman PB, 2011, NEW ENGL J MED, V364, P2507, <a href="#">DOI</a>  | 2011 | 2.7402   | 2014  | 2015 |             |
| Eisenhauer EA, 2009, EUR J CANCER, V45, P228, <a href="#">DOI</a>   | 2009 | 7.6084   | 2014  | 2017 |             |
| Robert C, 2011, NEW ENGL J MED, V364, P2517, <a href="#">DOI</a>    | 2011 | 2.3653   | 2015  | 2017 |             |
| Robert C, 2015, NEW ENGL J MED, V372, P320, <a href="#">DOI</a>     | 2015 | 3.6073   | 2015  | 2017 |             |
| Brahmer JR, 2010, J CLIN ONCOL, V28, P3167, <a href="#">DOI</a>     | 2010 | 2.9242   | 2015  | 2016 |             |
| Robert C, 2015, NEW ENGL J MED, V372, P2521, <a href="#">DOI</a>    | 2015 | 2.4558   | 2016  | 2017 |             |
| Ribas A, 2015, LANCET ONCOL, V16, P908, <a href="#">DOI</a>         | 2015 | 2.4856   | 2016  | 2017 |             |
| Postow MA, 2015, NEW ENGL J MED, V372, P2006, <a href="#">DOI</a>   | 2015 | 2.4856   | 2016  | 2017 |             |
| Rosenberg JE, 2016, LANCET, V387, P1909, <a href="#">DOI</a>        | 2016 | 2.5556   | 2017  | 2018 |             |
