# Supplementary material for: Trends in the Research Into Immune Checkpoint Blockade by Anti-PD1/PDL1 Antibodies in Cancer Immunotherapy: A Bibliometric Study
Source: PubMed Central journal article supplement (PMC8418110; doi:10.3389/fphar.2021.670900), 2021-08-17
Supplement: DataSheet4.pdf [file DataSheet4.pdf]

# Top 100 References with the Strongest Citation Bursts

| References                                                                | Year | Strength | Begin | End  | 2000 - 2020 |
|---------------------------------------------------------------------------|------|----------|-------|------|-------------|
| Nishimura H, 1999, IMMUNITY, V11, P141, <a href="#">DOI</a>               | 1999 | 9.9607   | 2001  | 2004 |             |
| Latchman Y, 2001, NAT IMMUNOL, V2, P261, <a href="#">DOI</a>              | 2001 | 21.9322  | 2001  | 2006 |             |
| Tseng SY, 2001, J EXP MED, V193, P839, <a href="#">DOI</a>                | 2001 | 14.8252  | 2001  | 2006 |             |
| Wang SD, 2000, BLOOD, V96, P2808                                          | 2000 | 3.3585   | 2001  | 2003 |             |
| Nishimura H, 2001, SCIENCE, V291, P319, <a href="#">DOI</a>               | 2001 | 17.4083  | 2001  | 2006 |             |
| Freeman GJ, 2000, J EXP MED, V192, P1027, <a href="#">DOI</a>             | 2000 | 25.5619  | 2001  | 2005 |             |
| Tamura H, 2001, BLOOD, V97, P1809, <a href="#">DOI</a>                    | 2001 | 9.2961   | 2001  | 2004 |             |
| Dong HD, 1999, NAT MED, V5, P1365                                         | 1999 | 19.276   | 2001  | 2004 |             |
| Yoshinaga SK, 1999, NATURE, V402, P827, <a href="#">DOI</a>               | 1999 | 4.0305   | 2001  | 2003 |             |
| Carter LL, 2002, EUR J IMMUNOL, V32, P634, <a href="#">DOI</a>            | 2002 | 9.5336   | 2002  | 2007 |             |
| Dong HD, 2002, NAT MED, V8, P793, <a href="#">DOI</a>                     | 2002 | 48.5068  | 2002  | 2007 |             |
| Nishimura H, 2001, TRENDS IMMUNOL, V22, P265, <a href="#">DOI</a>         | 2001 | 13.0781  | 2002  | 2006 |             |
| Sharpe AH, 2002, NAT REV IMMUNOL, V2, P116, <a href="#">DOI</a>           | 2002 | 11.1141  | 2002  | 2006 |             |
| Carreno BM, 2002, ANNU REV IMMUNOL, V20, P29, <a href="#">DOI</a>         | 2002 | 9.8052   | 2002  | 2006 |             |
| Ishida M, 2002, IMMUNOL LETT, V84, P57, <a href="#">DOI</a>               | 2002 | 5.9718   | 2002  | 2005 |             |
| Chambers CA, 2001, ANNU REV IMMUNOL, V19, P565, <a href="#">DOI</a>       | 2001 | 5.2269   | 2002  | 2006 |             |
| Iwai Y, 2002, P NATL ACAD SCI USA, V99, P12293, <a href="#">DOI</a>       | 2002 | 31.453   | 2003  | 2007 |             |
| Wang SD, 2003, J EXP MED, V197, P1083, <a href="#">DOI</a>                | 2003 | 10.0295  | 2003  | 2005 |             |
| Mazanet MM, 2002, J IMMUNOL, V169, P3581, <a href="#">DOI</a>             | 2002 | 10.5368  | 2003  | 2006 |             |
| Curiel TJ, 2003, NAT MED, V9, P562, <a href="#">DOI</a>                   | 2003 | 30.2665  | 2003  | 2008 |             |
| Chapoval AI, 2001, NAT IMMUNOL, V2, P269, <a href="#">DOI</a>             | 2001 | 6.0152   | 2003  | 2005 |             |
| Brown JA, 2003, J IMMUNOL, V170, P1257, <a href="#">DOI</a>               | 2003 | 27.7366  | 2003  | 2008 |             |
| Strome SE, 2003, CANCER RES, V63, P6501                                   | 2003 | 28.0632  | 2004  | 2008 |             |
| Phan GQ, 2003, P NATL ACAD SCI USA, V100, P8372, <a href="#">DOI</a>      | 2003 | 5.1799   | 2004  | 2007 |             |
| Prasad DVR, 2003, IMMUNITY, V18, P863, <a href="#">DOI</a>                | 2003 | 6.6568   | 2004  | 2006 |             |
| Yamazaki T, 2002, J IMMUNOL, V169, P5538, <a href="#">DOI</a>             | 2002 | 13.6095  | 2004  | 2007 |             |
| Blank C, 2004, CANCER RES, V64, P1140, <a href="#">DOI</a>                | 2004 | 19.3315  | 2004  | 2009 |             |
| Sica GL, 2003, IMMUNITY, V18, P849, <a href="#">DOI</a>                   | 2003 | 8.6557   | 2004  | 2006 |             |
| Ansari MJI, 2003, J EXP MED, V198, P63, <a href="#">DOI</a>               | 2003 | 6.3631   | 2004  | 2008 |             |
| Dong HD, 2004, IMMUNITY, V20, P327, <a href="#">DOI</a>                   | 2004 | 11.2147  | 2004  | 2009 |             |
| Wintterle S, 2003, CANCER RES, V63, P7462                                 | 2003 | 22.3091  | 2004  | 2008 |             |
| Dong HD, 2003, J CLIN INVEST, V111, P363, <a href="#">DOI</a>             | 2003 | 7.9893   | 2004  | 2006 |             |
| Iwai YH, 2003, J EXP MED, V198, P39, <a href="#">DOI</a>                  | 2003 | 9.0686   | 2004  | 2007 |             |
| Liang SC, 2003, EUR J IMMUNOL, V33, P2706, <a href="#">DOI</a>            | 2003 | 6.4758   | 2004  | 2007 |             |
| Youngnak P, 2003, BIOCHEM BIOPH RES CO, V307, P672, <a href="#">DOI</a>   | 2003 | 3.8844   | 2004  | 2007 |             |
| Zang XX, 2003, P NATL ACAD SCI USA, V100, P10388, <a href="#">DOI</a>     | 2003 | 4.6588   | 2004  | 2006 |             |
| Subudhi SK, 2004, J CLIN INVEST, V113, P694, <a href="#">DOI</a>          | 2004 | 3.993    | 2004  | 2006 |             |
| Dong HD, 2003, J MOL MED, V81, P281, <a href="#">DOI</a>                  | 2003 | 21.0314  | 2004  | 2008 |             |
| Hirano F, 2005, CANCER RES, V65, P1089                                    | 2005 | 37.4863  | 2005  | 2010 |             |
| Chen LP, 2004, NAT REV IMMUNOL, V4, P336, <a href="#">DOI</a>             | 2004 | 25.2848  | 2005  | 2009 |             |
| Konishi J, 2004, CLIN CANCER RES, V10, P5094, <a href="#">DOI</a>         | 2004 | 20.5274  | 2006  | 2009 |             |
| Ohigashi Y, 2005, CLIN CANCER RES, V11, P2947, <a href="#">DOI</a>        | 2005 | 21.8134  | 2006  | 2009 |             |
| Curiel TJ, 2004, NAT MED, V10, P942, <a href="#">DOI</a>                  | 2004 | 8.9696   | 2006  | 2009 |             |
| Thompson RH, 2004, P NATL ACAD SCI USA, V101, P17174, <a href="#">DOI</a> | 2004 | 25.0299  | 2006  | 2009 |             |
| Greenwald RJ, 2005, ANNU REV IMMUNOL, V23, P515, <a href="#">DOI</a>      | 2005 | 36.8263  | 2006  | 2010 |             |
| Ghebeh H, 2006, NEOPLASIA, V8, P190, <a href="#">DOI</a>                  | 2006 | 7.5078   | 2007  | 2011 |             |
| Barber DL, 2006, NATURE, V439, P682, <a href="#">DOI</a>                  | 2006 | 54.7131  | 2007  | 2011 |             |
| Thompson RH, 2006, CANCER RES, V66, P3381, <a href="#">DOI</a>            | 2006 | 28.2181  | 2007  | 2011 |             |
| Latchman YE, 2004, P NATL ACAD SCI USA, V101, P10691, <a href="#">DOI</a> | 2004 | 11.7179  | 2007  | 2009 |             |

|                                                                          |      |          |             |      |  |
|--------------------------------------------------------------------------|------|----------|-------------|------|--|
| Keir ME, 2006, J EXP MED, V203, P883, <a href="#">DOI</a>                | 2006 | 17.5374  | <b>2007</b> | 2011 |  |
| Dorfman DM, 2006, AM J SURG PATHOL, V30, P802, <a href="#">DOI</a>       | 2006 | 18.165   | <b>2007</b> | 2011 |  |
| Probst HC, 2005, NAT IMMUNOL, V6, P280, <a href="#">DOI</a>              | 2005 | 6.5064   | <b>2007</b> | 2009 |  |
| Petrovas C, 2006, J EXP MED, V203, P2281, <a href="#">DOI</a>            | 2006 | 16.4553  | <b>2007</b> | 2010 |  |
| Trautmann L, 2006, NAT MED, V12, P1198, <a href="#">DOI</a>              | 2006 | 27.5892  | <b>2007</b> | 2011 |  |
| Blank C, 2005, CANCER IMMUNOL IMMUN, V54, P307, <a href="#">DOI</a>      | 2005 | 12.3698  | <b>2007</b> | 2009 |  |
| Blank C, 2006, INT J CANCER, V119, P317, <a href="#">DOI</a>             | 2006 | 20.6762  | <b>2007</b> | 2011 |  |
| Parry RV, 2005, MOL CELL BIOL, V25, P9543, <a href="#">DOI</a>           | 2005 | 6.322    | <b>2007</b> | 2010 |  |
| Zou WP, 2005, NAT REV CANCER, V5, P263, <a href="#">DOI</a>              | 2005 | 7.1575   | <b>2007</b> | 2009 |  |
| Day CL, 2006, NATURE, V443, P350, <a href="#">DOI</a>                    | 2006 | 37.0328  | <b>2007</b> | 2011 |  |
| Thompson RH, 2007, CLIN CANCER RES, V13, P1757, <a href="#">DOI</a>      | 2007 | 5.8523   | <b>2008</b> | 2010 |  |
| Liu JZ, 2007, BLOOD, V110, P296, <a href="#">DOI</a>                     | 2007 | 9.0138   | <b>2008</b> | 2011 |  |
| Urbani S, 2006, J VIROL, V80, P11398, <a href="#">DOI</a>                | 2006 | 17.3993  | <b>2008</b> | 2011 |  |
| Blank C, 2007, CANCER IMMUNOL IMMUN, V56, P739, <a href="#">DOI</a>      | 2007 | 10.6243  | <b>2008</b> | 2012 |  |
| Butte MJ, 2007, IMMUNITY, V27, P111, <a href="#">DOI</a>                 | 2007 | 20.6462  | <b>2008</b> | 2012 |  |
| Azuma T, 2008, BLOOD, V111, P3635, <a href="#">DOI</a>                   | 2008 | 9.8274   | <b>2009</b> | 2011 |  |
| Zou WP, 2008, NAT REV IMMUNOL, V8, P467, <a href="#">DOI</a>             | 2008 | 25.292   | <b>2009</b> | 2013 |  |
| Sharpe AH, 2007, NAT IMMUNOL, V8, P239, <a href="#">DOI</a>              | 2007 | 24.2118  | <b>2009</b> | 2012 |  |
| Roncador G, 2007, HAEMATOLOGICA, V92, P1059, <a href="#">DOI</a>         | 2007 | 11.7954  | <b>2009</b> | 2011 |  |
| Keir ME, 2008, ANNU REV IMMUNOL, V26, P677, <a href="#">DOI</a>          | 2008 | 75.7052  | <b>2009</b> | 2013 |  |
| Hamanishi J, 2007, P NATL ACAD SCI USA, V104, P3360, <a href="#">DOI</a> | 2007 | 15.277   | <b>2009</b> | 2012 |  |
| Nomi T, 2007, CLIN CANCER RES, V13, P2151, <a href="#">DOI</a>           | 2007 | 14.6394  | <b>2009</b> | 2012 |  |
| de Leval L, 2007, BLOOD, V109, P4952, <a href="#">DOI</a>                | 2007 | 12.0901  | <b>2009</b> | 2012 |  |
| Blackburn SD, 2009, NAT IMMUNOL, V10, P29, <a href="#">DOI</a>           | 2009 | 28.3377  | <b>2010</b> | 2014 |  |
| Berger R, 2008, CLIN CANCER RES, V14, P3044, <a href="#">DOI</a>         | 2008 | 19.0764  | <b>2010</b> | 2013 |  |
| Xerri L, 2008, HUM PATHOL, V39, P1050, <a href="#">DOI</a>               | 2008 | 7.7956   | <b>2010</b> | 2012 |  |
| Ahmadzadeh M, 2009, BLOOD, V114, P1537, <a href="#">DOI</a>              | 2009 | 31.3003  | <b>2010</b> | 2014 |  |
| Gao Q, 2009, CLIN CANCER RES, V15, P971, <a href="#">DOI</a>             | 2009 | 16.5077  | <b>2010</b> | 2014 |  |
| Francisco LM, 2009, J EXP MED, V206, P3015, <a href="#">DOI</a>          | 2009 | 20.0716  | <b>2011</b> | 2014 |  |
| Brahmer JR, 2010, J CLIN ONCOL, V28, P3167, <a href="#">DOI</a>          | 2010 | 60.5392  | <b>2011</b> | 2015 |  |
| Velu V, 2009, NATURE, V458, P206, <a href="#">DOI</a>                    | 2009 | 12.6671  | <b>2011</b> | 2013 |  |
| Fourcade J, 2010, J EXP MED, V207, P2175, <a href="#">DOI</a>            | 2010 | 26.2237  | <b>2012</b> | 2015 |  |
| Wherry EJ, 2011, NAT IMMUNOL, V12, P492, <a href="#">DOI</a>             | 2011 | 38.2504  | <b>2012</b> | 2015 |  |
| Jin HT, 2010, P NATL ACAD SCI USA, V107, P14733, <a href="#">DOI</a>     | 2010 | 14.1325  | <b>2012</b> | 2014 |  |
| Gabrilovich DI, 2009, NAT REV IMMUNOL, V9, P162, <a href="#">DOI</a>     | 2009 | 7.9825   | <b>2012</b> | 2014 |  |
| Curran MA, 2010, P NATL ACAD SCI USA, V107, P4275, <a href="#">DOI</a>   | 2010 | 31.3738  | <b>2012</b> | 2015 |  |
| Hodi FS, 2010, NEW ENGL J MED, V363, P711, <a href="#">DOI</a>           | 2010 | 91.35    | <b>2012</b> | 2015 |  |
| Hino R, 2010, CANCER-AM CANCER SOC, V116, P1757, <a href="#">DOI</a>     | 2010 | 17.6544  | <b>2012</b> | 2015 |  |
| Robert C, 2011, NEW ENGL J MED, V364, P2517, <a href="#">DOI</a>         | 2011 | 52.7335  | <b>2012</b> | 2016 |  |
| Sakuishi K, 2010, J EXP MED, V207, P2187, <a href="#">DOI</a>            | 2010 | 32.5191  | <b>2012</b> | 2015 |  |
| Topalian SL, 2012, CURR OPIN IMMUNOL, V24, P207, <a href="#">DOI</a>     | 2012 | 33.0144  | <b>2013</b> | 2015 |  |
| Topalian SL, 2012, NEW ENGL J MED, V366, P2443, <a href="#">DOI</a>      | 2012 | 229.3384 | <b>2013</b> | 2017 |  |
| Pardoll DM, 2012, NAT REV CANCER, V12, P252, <a href="#">DOI</a>         | 2012 | 135.0377 | <b>2013</b> | 2017 |  |
| Taube JM, 2012, SCI TRANSL MED, V4, P0, <a href="#">DOI</a>              | 2012 | 70.3759  | <b>2013</b> | 2017 |  |
| Schreiber RD, 2011, SCIENCE, V331, P1565, <a href="#">DOI</a>            | 2011 | 22.9654  | <b>2013</b> | 2015 |  |
| Brahmer JR, 2012, NEW ENGL J MED, V366, P2455, <a href="#">DOI</a>       | 2012 | 147.6627 | <b>2013</b> | 2017 |  |
| Woo SR, 2012, CANCER RES, V72, P917, <a href="#">DOI</a>                 | 2012 | 17.0651  | <b>2013</b> | 2015 |  |
| Wolchok JD, 2013, NEW ENGL J MED, V369, P122, <a href="#">DOI</a>        | 2013 | 42.4843  | <b>2014</b> | 2016 |  |
| Hamid O, 2013, NEW ENGL J MED, V369, P134, <a href="#">DOI</a>           | 2013 | 66.2803  | <b>2014</b> | 2016 |  |
| Powles T, 2014, NATURE, V515, P558, <a href="#">DOI</a>                  | 2014 | 32.1831  | <b>2015</b> | 2018 |  |
| Fehrenbacher L, 2016, LANCET, V387, P1837, <a href="#">DOI</a>           | 2016 | 28.2421  | <b>2017</b> | 2020 |  |
